# Supplementary material for: Materials for Outer Shell of 1.170 Gwh (1.00669 Kilo Ton TNT) Fusion Device - Weight Basis
Source: Preprints.org preprint supplement (doi:10.20944/preprints202110.0446.v2), 2023-01-17
Supplement: Supplementary file 1 [file supplementary]

---

**From:** Muhammad Musaddique Ali Rafique  
**Sent:** Monday, January 16, 2023 10:44 AM  
**To:** djokic@mdpi.com  
**Cc:** info@preprints.org; Eastern Engineering  
**Subject:** Re: [Preprints] Preprints ID: preprints-67392 - [Preprints] Preprint Status: Your preprint is declined for announcement

I disagree and resubmit.  
As requested earlier, please do not handle the manuscript.  
You have a habit of refusing. You took manuscript from earlier assigned editor in the morning and willfully refused it.  
It is second time you did this intentionally.  
Again, do not handle the manuscript.  
You are disrespectful and ugly.

Copy  
Federal Bureau of Investigation  
Central Intelligence Agency  
US Department of Education  
US Congress  
General Public

Get [Outlook for Android](#)

---

**From:** djokic@mdpi.com <djokic@mdpi.com>  
**Sent:** Monday, January 16, 2023 10:24:40 AM  
**To:** Muhammad Musaddique Ali Rafique <ali.rafique@easternengineeringcambridge.onmicrosoft.com>  
**Cc:** info@preprints.org <info@preprints.org>  
**Subject:** [Preprints] Preprints ID: preprints-67392 - [Preprints] Preprint Status: Your preprint is declined for announcement

Dear Dr. Rafique,

It is with regret that we must inform you that your following submission to Preprints has been declined for announcement:

Preprints ID: 202110.0446.v2  
Type: Short Note  
Title: Materials for Outer Shell of 1.170 GWh (1.00669 Kilo Ton TNT) Fusion Device - Weight Basis  
Authors: Muhammad Musaddique Ali Rafique  
Emails: [ali.rafique@easternengineeringcambridge.onmicrosoft.com](mailto:ali.rafique@easternengineeringcambridge.onmicrosoft.com)  
Submission received: 2023-01-13

This decision was made by Preprints moderators. For details about Preprints

moderation process, please go to  
[https://www.preprints.org/how it works#preprint](https://www.preprints.org/how_it_works#preprint)

We would like to thank you for your support of Preprints and wish you every success in the future. If you have any questions or concerns, please do not hesitate to contact us at [info@preprints.org](mailto:info@preprints.org).

Best Regards,  
Bojana Djokic  
Preprints Editor

Preprints Editorial Office  
Email: [info@preprints.org](mailto:info@preprints.org)  
<https://www.preprints.org/>
